# Supplementary material for: Control of crystallographic phases and surface characterization of intermetallic platinum tin nanoparticles
Source: Royal Society of Chemistry journal article supplement (doi:10.1039/c9ce00356h), 2019-01-01
Supplement: c9ce00356h1.pdf [file c9ce00356h1.pdf]

Supporting Information

## Control of Crystallographic Phases and Surface Characterization of Intermetallic Platinum Tin Nanoparticles

Alexandra J. Erdt<sup>\*a</sup>, Christian Gutsche<sup>a</sup>, Ursula E. A. Fittschen<sup>b</sup>, Holger Borchert<sup>a</sup>, Jürgen Parisi<sup>a</sup> and Joanna Kolny-Olesiak<sup>\*a</sup>

<sup>a</sup> Energy and Semiconductor Research Laboratory, Department of Physics, Carl von Ossietzky University of Oldenburg, D-26111 Oldenburg, Germany.

<sup>b</sup> Material Analysis and Functional Solid Matter Group, Institute of Inorganic and Analytical Chemistry, TU Clausthal, Arnold-Sommerfeld-Str. 4, D-38678 Clausthal-Zellerfeld

\* alexandra.erdt@uni-oldenburg.de

\* joanna.kolny@uni-oldenburg.de

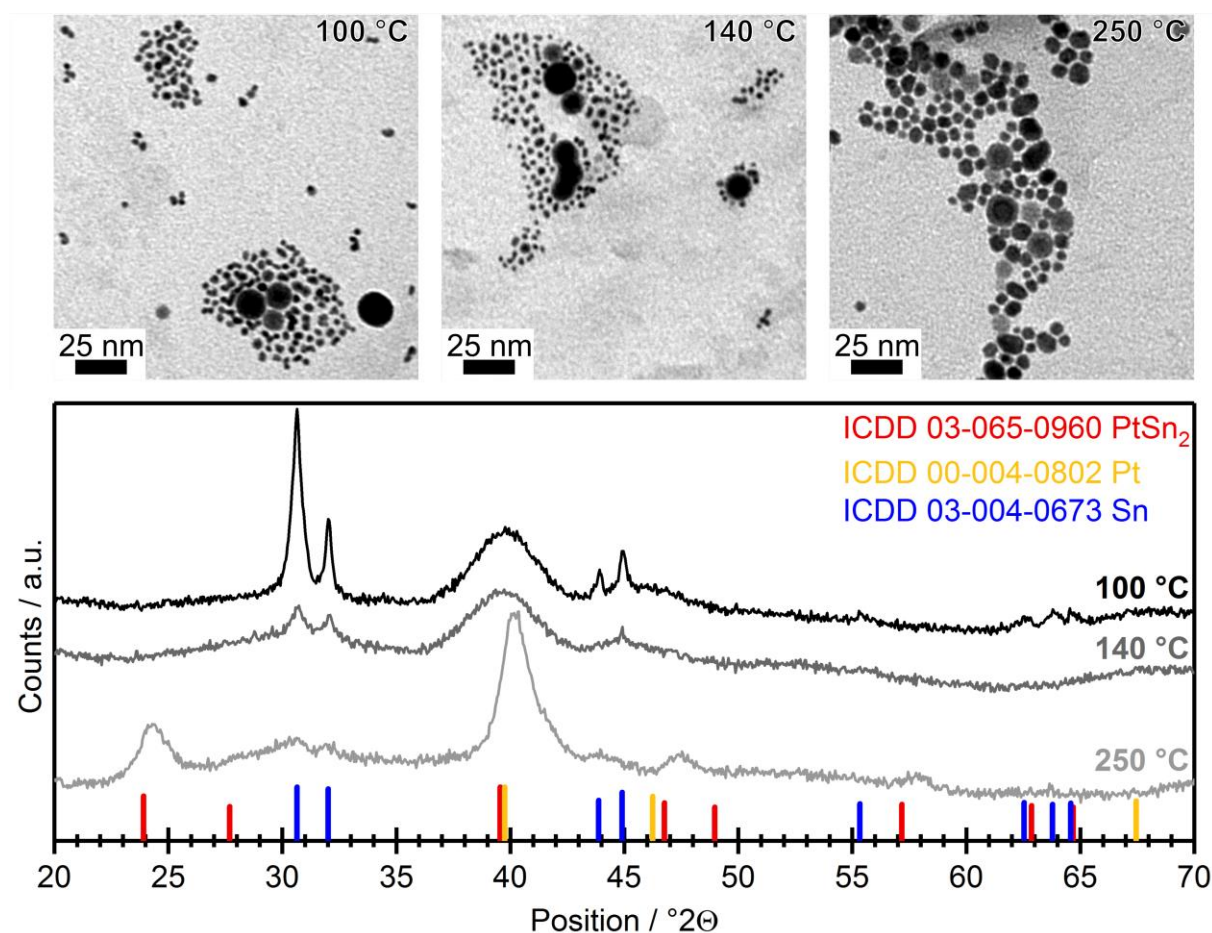

Figure SI 1: TEM images and XRD measurements of nanoparticles obtained by reactions at 100 °C and 140 °C.

The size of the faceted crystals was estimated based on the particle area. From this, a diameter of crystals with spherical shape was determined. This allows comparison with the quasi-spherical 2 nm and 4 nm particles. The size of the smaller and more spherical platinum nanoparticles as well as the platinum-tin nanocrystals were obtained by the determination of the primary and secondary axis of the best fitting ellipse. They were averaged afterwards what gives the diameter. A comparison of both methods reveal a similar size of the 4 nm as well as the 6 nm particles as one can see in Figure SI 3.

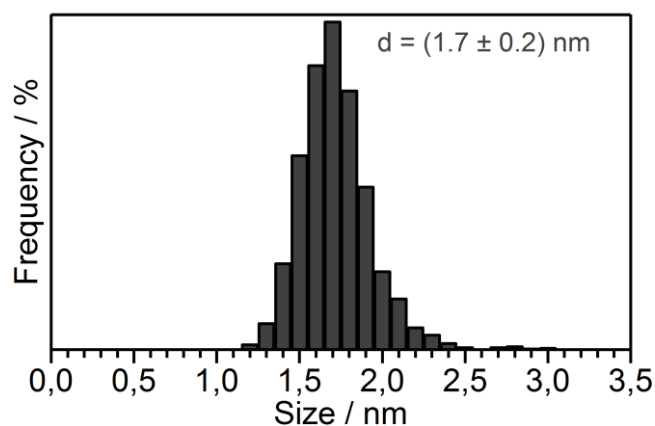

Figure SI 2: Size distribution of the 2 nm platinum seeds.

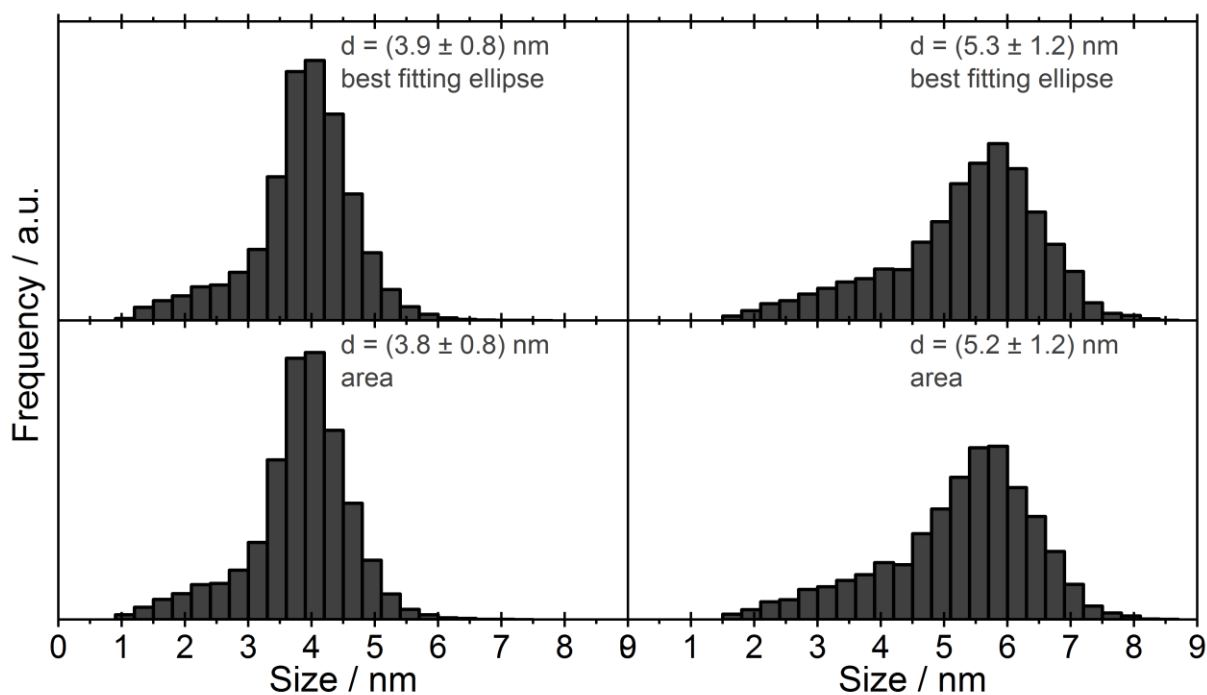

Figure SI 3: Size distribution of 4 nm platinum particles (left side) and 6 nm platinum particles (right side) determined by the best fitting ellipse and by the area.

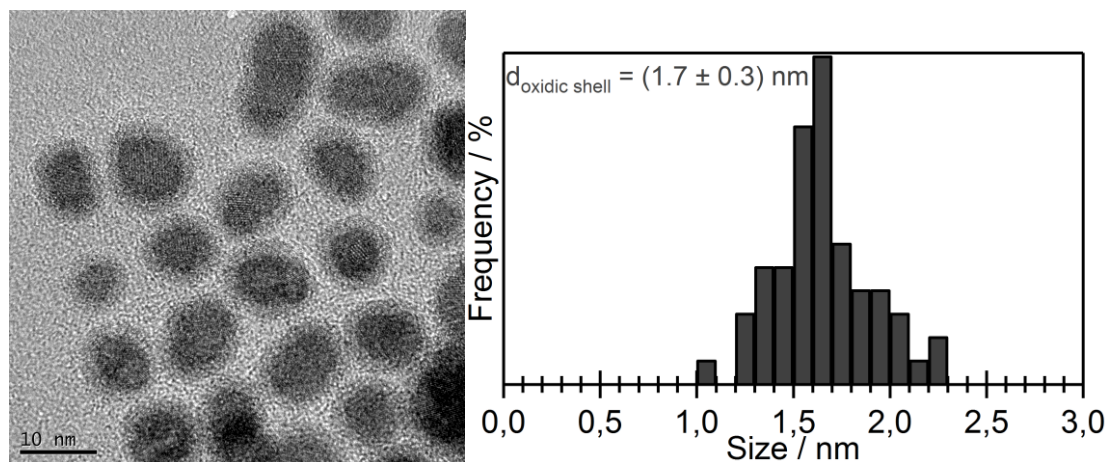

Figure SI 4: TEM image (left) of the sample  $\text{PtSn}_2\text{-Pt}_{6\text{nm}}$  and the size distribution (right) of the thickness of the oxidic shell, obtained by measuring the shell at 59 randomly chosen places in the TEM image.

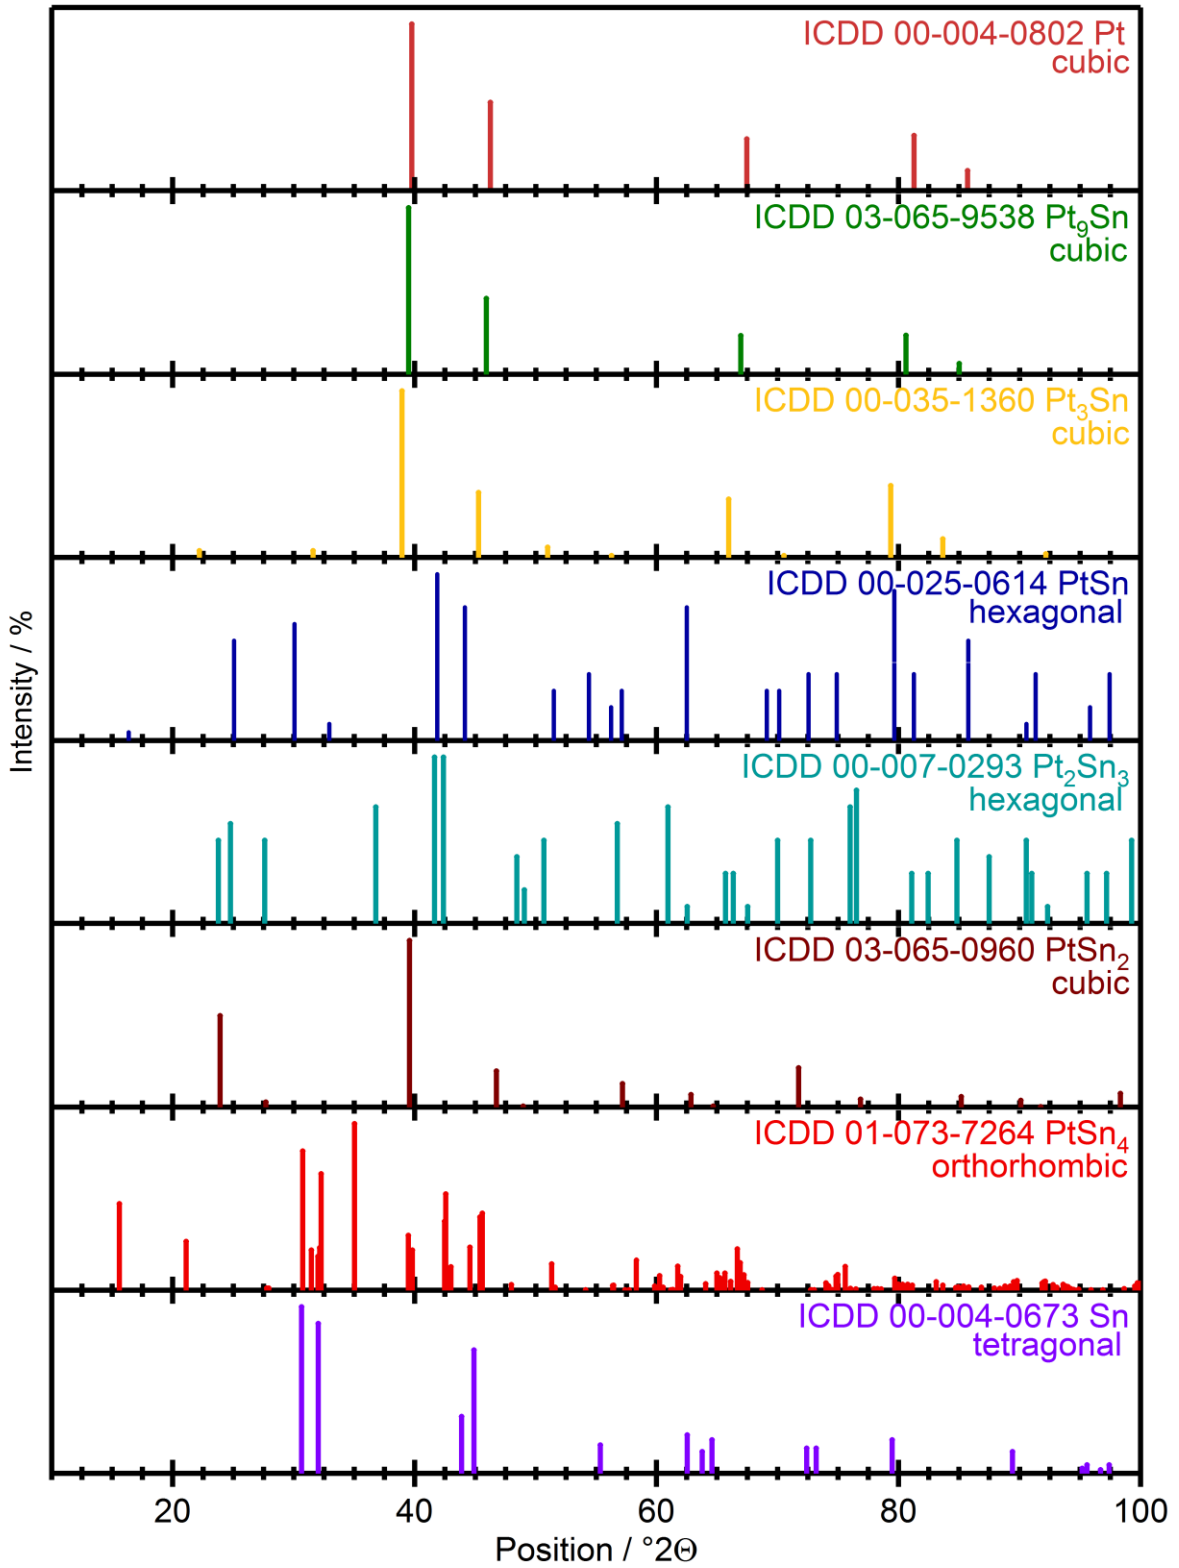

Figure SI 5: Reference patterns for XRD analysis.
